# Supplementary material
Source: PubMed Central journal article supplement (PMC3365992)
Supplement: supp_M112.342709_jbc.M112.342709-1.pdf [file supp_M112.342709_jbc.M112.342709-1.pdf]

## Supplemental Table

### Primers used in real-time quantitative PCR

|                                                  |                  |                                |
|--------------------------------------------------|------------------|--------------------------------|
| <b>Human</b><br>2',5'-Oligoadenylate synthase-1A | <b>Sense</b>     | 5' -GTGTGTCCAAGGTGGTAAAGG-3'   |
|                                                  | <b>Antisense</b> | 5' -CTGCTCAAACCTTCACGGAA-3'    |
| <b>Human Mx1</b>                                 | <b>Sense</b>     | 5' -GCCAGGACCAGGTATACAG-3'     |
|                                                  | <b>Antisense</b> | 5' -GCTCCTTCAGGAGCCAGA -3'     |
| <b>Human IRS-2</b>                               | <b>Sense</b>     | 5' -AGCCGGGAGACAAGAG-3'        |
|                                                  | <b>Antisense</b> | 5' -TGATACTCTCTGACATGT-3'      |
| <b>Human GAPDH</b>                               | <b>Sense</b>     | 5' -GCCAAAAGGGTCATCATCT-3'     |
|                                                  | <b>Antisense</b> | 5' -ATGGATGACCTTGCCAG-3'       |
| <b>Mouse</b><br>2',5'-Oligoadenylate synthase-1A | <b>Sense</b>     | 5' -GCTGATGTCAAATCAGCCGT-3'    |
|                                                  | <b>Antisense</b> | 5' -AGCTTGAAGCTCAGAGACC-3'     |
| <b>Mouse Mx1</b>                                 | <b>Sense</b>     | 5' -GGGGAGGAAATAGAGAAAATGAT-3' |
|                                                  | <b>Antisense</b> | 5' -GTTTACAAAGGGCTTGCTTGCT-3'  |
| <b>Mouse PTP1B</b>                               | <b>Sense</b>     | 5' -CGGCTATTTACCAGGACATTC-3'   |
|                                                  | <b>Antisense</b> | 5' -TGCGGTTGAGCATGACCAC-3'     |
| <b>Mouse <math>\beta</math>-Actin</b>            | <b>Sense</b>     | 5' -ATGGATGACGATATCGCTG-3'     |
|                                                  | <b>Antisense</b> | 5' -GTTGGTAACAATGCCATGTTC-3'   |
